# Supplementary material for: Quality Control, Anti-Hyperglycemic, and Anti-Inflammatory Assessment of Colvillea racemosa Leaves Using In Vitro, In Vivo Investigations and Its Correlation with the Phytoconstituents Identified via LC-QTOF-MS and MS/MS
Source: MDPI journal article supplement (doi:10.3390/plants11060830), 2022-03-21
Supplement: s1 [file s1]

Figure S1: Fragmentation patterns of **(a)** apigenin C hexoside, **(b)** apigenin O-deoxyhexoside hexoside II, and **(c)** luteoin C-deoxyhexoside C-hexoside.

Figure S2: Fragmentation pattern of **(a)** syringin, **(b)** hydroxymethyl hydroxypyrrolidine III, and **(c)** phenylalanine.
